# Supplementary material for: Individual behavioral trajectories shape whole-brain connectivity in mice
Source: eLife. 2023 Jan 16;12:e80379. doi: 10.7554/eLife.80379 (PMC9977274; doi:10.7554/eLife.80379)
Supplement: Supplementary file 1. [file elife-80379-supp1.xlsx]

## Sheet: Tabelle1
Supplementary File 1
Absolute volume (mm3)	STR		ENR
Atlas region of interest	Mean	SD	Mean	SD	Effect size	p-value	q-value
CA10r	2.01428	0.0551861	2.16316	0.0877551	2.7	1.0621e-06	0.0002
CA3Rad	1.86636	0.0501575	1.97705	0.0713683	2.21	1.6876e-05	0.001
CA1Py	1.01039	0.0338336	1.08496	0.0449965	2.2	1.7227e-05	0.001
Cingulate cortex: area 25	0.552094	0.0233814	0.601551	0.0448482	2.12	5.0712e-05	0.0017
subependymale zone / rhinocele	0.0539144	0.0022136	0.0584999	0.00280695	2.07	3.6106e-05	0.0016
CA2Rad	0.496412	0.0170498	0.530579	0.0251947	2	5.5843e-05	0.0017
CA2Py	0.181768	0.00646279	0.194387	0.00921149	1.95	7.3108e-05	0.0019
SLu	0.62484	0.0157395	0.654881	0.0279566	1.91	0.0001	0.0032
anterior commissure: pars anterior	1.13732	0.0355595	1.19975	0.0396494	1.76	0.0002	0.0039
CA1Rad	2.46686	0.0966677	2.63614	0.0976186	1.75	0.0002	0.0039
CA20r	0.467453	0.0188472	0.499252	0.0225488	1.69	0.0003	0.0051
CA3Py Inner	0.112963	0.0045581	0.120324	0.00385686	1.61	0.0005	0.007
Medial orbital cortex	1.83527	0.0723523	1.94843	0.109612	1.56	0.0008	0.0104
LMol	2.35432	0.0920807	2.49541	0.0988333	1.53	0.0007	0.01
CA3Py Outer	0.941615	0.024131	0.978371	0.046154	1.52	0.0018	0.0209
Dorsal tenia tecta	1.02596	0.0480894	1.09766	0.0818474	1.49	0.0016	0.0192
GrDG	1.22103	0.0552176	1.29447	0.0423633	1.33	0.0021	0.0223
subiculum	3.43229	0.132687	3.6006	0.114589	1.27	0.0029	0.0296
olfactory peduncle	2.5405	0.0665503	2.62269	0.0903746	1.24	0.0047	0.0409
PoDG	0.514773	0.0264606	0.547383	0.0182818	1.23	0.0035	0.0333
Anterior olfactory nucleus	2.24152	0.0599976	2.31485	0.0759601	1.22	0.0047	0.0409
MoDG	4.24516	0.180982	4.45255	0.157755	1.15	0.0057	0.0476
Olfactory bulb: internal plexiform layer	0.729142	0.0162535	0.750245	0.0337613	1.3	0.0085	0.06
Olfactory bulb: mitral cell layer	1.01906	0.0238035	1.04996	0.0467825	1.3	0.0072	0.06
Olfactory bulb: external plexiform layer	7.04048	0.180732	7.22921	0.320104	1.04	0.0217	0.14
Olfactory bulb: granule cell layer	4.46834	0.147506	4.6188	0.200006	1.02	0.016	0.11
fimbria	3.12303	0.122325	3.239	0.207449	0.95	0.0329	0.18
bed nucleus of stria terminalis	1.26062	0.0403735	1.29879	0.0628723	0.95	0.029	0.17
nucleus accumbens	4.26586	0.170302	4.4268	0.19504	0.95	0.0204	0.13
Accessory olfactory bulb: granule cell layer	0.185094	0.0103714	0.194892	0.00947742	0.94	0.0178	0.12
lateral septum	2.97716	0.119637	3.08958	0.160127	0.94	0.0245	0.15
corpus callosum	12.7112	0.362187	13.0488	0.618863	0.93	0.0361	0.19
Temporal association area	2.5529	0.0859348	2.62896	0.116141	0.89	0.0332	0.18
Cingulum	0.881295	0.0405471	0.914174	0.0495105	0.81	0.0444	0.23
Cingulate cortex: area 32	2.54245	0.17651	2.67581	0.145187	0.76	0.0474	0.24
lobule 8 white matter	0.106246	0.0076673	0.100382	0.00760907	-0.76	0.049	0.24
trunk of lobules 6-8 white matter	0.133815	0.007852	0.125575	0.00922248	-1.05	0.0117	0.08
Medial preoptic nucleus	0.172337	0.011565	0.178476	0.0122732	3.6	0.1613	0.494
Cingulate cortex: area 24a	1.90104	0.0978624	1.96585	0.123192	3.4	0.0962	0.3647
cerebral aqueduct	0.373848	0.0302067	0.386033	0.0573133	3.3	0.3685	0.6952
Cingulate cortex: area 24b	1.71044	0.105951	1.7645	0.0908388	3.2	0.164	0.494
Secondary somatosensory cortex	5.92902	0.240937	6.11428	0.299814	3.1	0.056	0.2531
thalamus	17.4495	0.915139	17.9584	1.00996	2.9	0.1463	0.4843
posterior commissure	0.15226	0.0134076	0.156667	0.0139875	2.9	0.3743	0.6952
Ectorhinal cortex	2.63406	0.102979	2.70863	0.133349	2.8	0.0727	0.307
CA30r	3.00646	0.0986119	3.08917	0.161187	2.8	0.0537	0.2531
Frontal cortex: area 3	0.699761	0.030322	0.718624	0.0312189	2.7	0.1032	0.373
Cingulate cortex: area 29c	1.98782	0.0930705	2.04034	0.107693	2.6	0.1445	0.4843
Frontal association cortex	7.21919	0.287281	7.4034	0.336606	2.6	0.1012	0.373
Dorsolateral orbital cortex	0.926357	0.0375911	0.949925	0.0462412	2.5	0.112	0.3919
paraflocculus white matter	0.180926	0.0168646	0.185508	0.0158758	2.5	0.4524	0.7447
Ventral orbital cortex	1.58245	0.0494891	1.62218	0.0739873	2.5	0.057	0.2531
internal capsule	3.1863	0.0997074	3.26478	0.177561	2.5	0.0776	0.307
Accessory olfactory bulb: glomerular, external plexiform and mitral cell layer	0.371231	0.0259154	0.380212	0.0261207	2.4	0.3466	0.6932
fourth ventricle	0.728995	0.0569341	0.746035	0.0617441	2.3	0.4211	0.7413
striatum	20.0131	0.591263	20.4749	0.785569	2.3	0.0559	0.2531
mammilothalamic tract	0.248428	0.00988463	0.25407	0.0146557	2.3	0.1657	0.494
fundus of striatum	0.172856	0.00570742	0.176728	0.00861176	2.2	0.1045	0.373
globus pallidus	3.31254	0.174934	3.38644	0.196588	2.2	0.2645	0.6173
Lateral parietal association cortex	0.207976	0.0113933	0.212599	0.0119052	2.2	0.2763	0.6361
cerebellar peduncle: superior	1.03777	0.0569772	1.0607	0.0673186	2.2	0.2923	0.6361
periaqueductal grey	3.83603	0.257758	3.92038	0.258006	2.2	0.3727	0.6952
Secondary auditory cortex: ventral area	1.47096	0.0593568	1.5032	0.0739119	2.2	0.1659	0.494
pre-para subiculum	2.17635	0.119248	2.22291	0.11862	2.1	0.2898	0.6361
lobules 4-5 white matter	0.504298	0.0504084	0.514929	0.0381636	2.1	0.5459	0.7866
Cingulate cortex: area 24a'	0.859993	0.0544048	0.87811	0.0483801	2.1	0.3555	0.6952
Olfactory bulb: glomerular layer	4.66333	0.123512	4.76032	0.217948	2.1	0.0772	0.307
Primary somatosensory cortex	4.08077	0.152099	4.16461	0.196952	2.1	0.1638	0.494
Primary somatosensory cortex: upper lip region	5.18727	0.206989	5.29374	0.274223	2.1	0.195	0.5311
Perirhinal cortex	2.41352	0.103523	2.46293	0.129398	2	0.2209	0.5583
midbrain	14.158	0.731111	14.4271	0.901826	1.9	0.3391	0.6882
flocculus white matter	0.0487534	0.00515906	0.0496768	0.00368693	1.9	0.6052	0.8278
stria medullaris	0.7385	0.0358207	0.75241	0.0396556	1.9	0.3021	0.641
fornix	0.739707	0.0274006	0.753546	0.0344038	1.9	0.1967	0.5311
colliculus: superior	8.89178	0.548286	9.05114	0.562052	1.8	0.4292	0.7413
medial septum	1.40736	0.0462734	1.43215	0.0558485	1.8	0.1683	0.494
Secondary motor cortex	6.15075	0.220222	6.25852	0.259188	1.8	0.2036	0.5369
lobule 10: nodulus	1.20614	0.059367	1.22633	0.085608	1.7	0.3975	0.7234
interpedunclar nucleus	0.267563	0.0207858	0.272027	0.0214201	1.7	0.5575	0.7866
Medial parietal association cortex	0.452983	0.0223485	0.460485	0.0245758	1.7	0.3696	0.6952
Caudomedial entorhinal cortex	4.94267	0.295554	5.0226	0.2245	1.6	0.4411	0.7413
cerebral peduncle	2.44676	0.101228	2.48595	0.111275	1.6	0.3029	0.641
Medial entorhinal cortex	0.674684	0.0437808	0.684739	0.0247504	1.5	0.5005	0.772
lateral olfactory tract	1.54079	0.0427448	1.56364	0.0658116	1.5	0.1984	0.5311
basal forebrain	5.59848	0.143344	5.68121	0.236057	1.5	0.1763	0.5013
Insular region: not subdivided	6.59013	0.119678	6.68259	0.31296	1.4	0.1521	0.494
hypothalamus	10.9107	0.357042	11.0635	0.514589	1.4	0.2893	0.6361
Primary somatosensory cortex: jaw region	0.65841	0.0310477	0.667569	0.0315505	1.4	0.4217	0.7413
nucleus interpositus	0.436002	0.0208893	0.441883	0.0249003	1.3	0.4583	0.7447
Cingulate cortex: area 24b'	0.594556	0.0291877	0.602245	0.0327751	1.3	0.4811	0.7618
Claustrum: dorsal part	0.218463	0.00774913	0.221261	0.0100748	1.3	0.3548	0.6952
Secondary visual cortex: lateral area	2.45818	0.0997697	2.48952	0.100271	1.3	0.3921	0.7209
colliculus: inferior	5.82208	0.326234	5.89512	0.344384	1.3	0.5431	0.7866
third ventricle	1.16627	0.0432721	1.18058	0.0758116	1.2	0.444	0.7413
lobules 4-5: culmen (ventral and dorsal)	4.32928	0.240456	4.38201	0.271198	1.2	0.557	0.7866
Primary motor cortex	7.18949	0.342934	7.277	0.347478	1.2	0.4856	0.7618
Medial amygdala	1.32442	0.0379942	1.34031	0.0684891	1.2	0.3403	0.6882
Cingulate cortex: area 29a	0.71487	0.0379149	0.723394	0.0417246	1.2	0.545	0.7866
stria terminalis	0.932127	0.0219991	0.942888	0.0448798	1.2	0.2936	0.6361
Secondary visual cortex: mediolateral area	1.01071	0.0486952	1.02193	0.0568326	1.1	0.5407	0.7866
Secondary auditory cortex: dorsal area	1.30298	0.0555765	1.31738	0.0536628	1.1	0.4753	0.7618
ventral tegmental decussation	0.12948	0.0105305	0.130903	0.01122	1.1	0.7129	0.8709
paraflocculus (PFL)	2.17827	0.31265	2.20177	0.342069	1.1	0.8385	0.9382
Amygdalopiriform transition area	1.02236	0.0675363	1.03266	0.0575522	1	0.6659	0.8417
Ventral intermediate entorhinal cortex	1.01945	0.0734013	1.02943	0.0488849	1	0.6916	0.8611
pons	17.7819	0.668319	17.9548	0.925332	1	0.5127	0.7783
Primary auditory cortex	1.34554	0.0493932	1.35859	0.0573748	1	0.4832	0.7618
Dorsal nucleus of the endopiriform	1.50787	0.0302347	1.52211	0.0561427	0.9	0.2902	0.6361
Posteromedial cortical amygdaloid area	1.32267	0.07444	1.33499	0.0757088	0.9	0.6498	0.8341
Primary somatosensory cortex: trunk region	0.472445	0.0268187	0.476773	0.024165	0.9	0.6508	0.8341
anterior commissure: pars posterior	0.524416	0.0205041	0.528673	0.0256656	0.8	0.5877	0.8165
Primary visual cortex	2.10831	0.139403	2.12529	0.108065	0.8	0.7268	0.8709
Secondary visual cortex: mediomedial area	1.68885	0.0773308	1.70237	0.0901301	0.8	0.6416	0.8341
Claustrum	0.305364	0.011809	0.307786	0.0139902	0.8	0.5868	0.8165
Claustrum: ventral part	0.505049	0.0142106	0.509043	0.0226748	0.8	0.4986	0.772
flocculus (FL)	0.838353	0.0580517	0.844922	0.0484171	0.8	0.7476	0.8835
dentate nucleus	0.322263	0.0190479	0.324763	0.0199367	0.8	0.7198	0.8709
Ventral tenia tecta	0.12596	0.0078955	0.126802	0.00821958	0.7	0.7703	0.9045
facial nerve (cranial nerve 7)	0.237029	0.0101409	0.238594	0.0141122	0.7	0.6955	0.8611
Intermediate nucleus of the endopiriform claustrum	0.644175	0.0210887	0.648417	0.0325974	0.7	0.6231	0.8278
Primary somatosensory cortex: dysgranular zone	0.325209	0.0184498	0.327273	0.0134418	0.6	0.7463	0.8835
fasciculus retroflexus	0.28207	0.0222146	0.283576	0.0224476	0.5	0.8518	0.9382
Cingulate cortex: area 30	2.68478	0.103271	2.69819	0.117021	0.5	0.7274	0.8709
Primary visual cortex: monocular area	1.81633	0.0831152	1.82488	0.0943959	0.5	0.7823	0.9126
Lateral orbital cortex	3.34821	0.110752	3.36338	0.15023	0.5	0.7263	0.8709
amygdala	10.1274	0.225643	10.1711	0.407552	0.4	0.657	0.8362
Primary visual cortex: binocular area	1.95058	0.0870302	1.95731	0.087445	0.3	0.8311	0.9382
optic tract	1.95939	0.0739016	1.96586	0.0961422	0.3	0.8204	0.9332
Ventral nucleus of the endopiriform claustrum	0.539108	0.0140769	0.540593	0.0229572	0.3	0.8002	0.9276
simple lobule (lobule 6)	4.90206	0.272303	4.91147	0.246822	0.2	0.9226	0.9623
Cingulate cortex: area 29b	0.405547	0.0288646	0.406264	0.0234199	0.2	0.9433	0.9623
Parietal cortex: posterior area: rostral part	0.10143	0.00703225	0.101606	0.00610671	0.2	0.9435	0.9623
trunk of simple and crus 1 white matter	0.168072	0.00828012	0.16834	0.00880986	0.2	0.9297	0.9623
Dorsolateral entorhinal cortex	2.77983	0.178146	2.78351	0.149139	0.1	0.9531	0.9637
fastigial nucleus	0.456478	0.0217857	0.457017	0.0230038	0.1	0.9461	0.9623
Primary somatosensory cortex: barrel field	8.61872	0.438087	8.62687	0.420137	0.1	0.9587	0.964
lobule 3: central lobule (dorsal)	1.97734	0.14052	1.97586	0.13042	-0.1	0.9764	0.9764
anterior lobule (lobules 4-5)	1.5846	0.0845318	1.58226	0.072494	-0.1	0.9374	0.9623
trunk of arbor vita	4.69676	0.153673	4.6879	0.193978	-0.2	0.88	0.9427
Primary somatosensory cortex: shoulder region	0.177119	0.00999204	0.17677	0.00952735	-0.2	0.9223	0.9623
inferior olivary complex	0.415857	0.0349926	0.414997	0.0370388	-0.2	0.9465	0.9623
Dorsal intermediate entorhinal cortex	1.77324	0.118629	1.76826	0.0858639	-0.3	0.9031	0.9612
mammillary bodies	0.607555	0.0307007	0.605771	0.0402082	-0.3	0.8805	0.9427
Primary somatosensory cortex: hindlimb region	2.4305	0.115289	2.42335	0.131716	-0.3	0.8679	0.9427
Primary somatosensory cortex: forelimb region	3.67515	0.209564	3.66176	0.175776	-0.4	0.8557	0.9382
simple lobule white matter	0.317675	0.0212272	0.316267	0.020933	-0.4	0.8542	0.9382
copula: pyramis (lobule 8)	2.4949	0.192393	2.482	0.158724	-0.5	0.8483	0.9382
lateral ventricle	3.27353	0.411363	3.25023	0.373045	-0.7	0.8735	0.9427
medulla	29.8664	1.15773	29.6447	1.50145	-0.7	0.6202	0.8278
lobule 9: uvula	2.90662	0.257841	2.88434	0.226328	-0.8	0.8072	0.9298
anterior lobule white matter	0.0496982	0.00274889	0.0493122	0.00257032	-0.8	0.6952	0.8611
lobule 9 white matter	0.280038	0.0292345	0.277677	0.0242165	-0.8	0.818	0.9332
cerebellar peduncle: middle	1.36585	0.051714	1.35356	0.0639617	-0.9	0.5341	0.7866
lobule 10 white matter	0.0725279	0.0036706	0.0718194	0.00628085	-1	0.6505	0.8341
Piriform cortex	10.3769	0.341104	10.2632	0.589795	-1.1	0.4376	0.7413
trunk of lobules 1-3 white matter	0.150229	0.00631088	0.148486	0.0109424	-1.2	0.5199	0.7819
crus 1: ansiform lobule (lobule 6)	4.52595	0.237277	4.46961	0.23219	-1.2	0.5132	0.7783
olfactory tubercle	4.17164	0.221818	4.11753	0.336417	-1.3	0.5491	0.7866
cerebellar peduncle: inferior	0.809106	0.0215163	0.798392	0.0395553	-1.3	0.2621	0.6173
lobule 3 white matter	0.16277	0.0132564	0.160593	0.0115367	-1.3	0.6434	0.8341
Posterolateral cortical amygdaloid area	0.92868	0.0210116	0.915903	0.0467227	-1.4	0.2136	0.5541
Rostral amygdalopiriform area	0.43032	0.0208723	0.424249	0.023326	-1.4	0.4369	0.7413
copula white matter	0.0637369	0.00520305	0.0628072	0.00441079	-1.5	0.6133	0.8278
cuneate nucleus	0.289592	0.0234009	0.285188	0.022172	-1.5	0.6012	0.8278
lobules 6-7 white matter	0.786399	0.0343351	0.773333	0.046347	-1.7	0.3352	0.6882
crus 1 white matter	0.290165	0.0194723	0.284522	0.0209263	-1.9	0.4348	0.7413
medial lemniscus/medial longitudinal fasciculus	2.8272	0.159685	2.76912	0.161669	-2.1	0.3245	0.6788
lobules 1-2: lingula and central lobule (ventral)	1.60085	0.135687	1.56515	0.11194	-2.2	0.4579	0.7447
lobule 6: declive	2.83152	0.115015	2.76803	0.177446	-2.2	0.185	0.5181
superior olivary complex	0.748492	0.0407982	0.731419	0.0353584	-2.3	0.2485	0.6111
habenular commissure	0.0284698	0.00380206	0.0277721	0.00411348	-2.5	0.6192	0.8278
paramedian lobule (lobule 7)	4.2732	0.4047	4.16461	0.274433	-2.5	0.4394	0.7413
pontine nucleus	0.990002	0.0467202	0.962014	0.0513291	-2.8	0.1193	0.4097
crus 2: ansiform lobule (lobule 7)	4.32468	0.395218	4.19998	0.278009	-2.9	0.3674	0.6952
trunk of crus 2 and paramedian white matter	0.407882	0.031995	0.394772	0.0272262	-3.2	0.2569	0.6173
Cortex-amygdala transition zones	0.841173	0.0362826	0.813273	0.0599173	-3.3	0.0761	0.307
lobule 8: pyramis	1.6163	0.0857099	1.55547	0.107613	-3.8	0.0761	0.307
crus 2 white matter	0.219074	0.0218339	0.210402	0.0164442	-4	0.2644	0.6173
paramedian lobule	0.11406	0.011226	0.109076	0.00863994	-4.4	0.2161	0.5541
lobule 7: tuber (or folium)	1.15129	0.105029	1.0984	0.0992639	-4.6	0.1745	0.5013
lobule 1-2 white matter	0.0566232	0.00603894	0.0540089	0.00613429	-4.6	0.2444	0.6093
corticospinal tract/pyramids	2.12628	0.175155	2.0122	0.139875	-5.4	0.0805	0.3118
