# Supplementary material for: Individual behavioral trajectories shape whole-brain connectivity in mice
Source: eLife. 2023 Jan 16;12:e80379. doi: 10.7554/eLife.80379 (PMC9977274; doi:10.7554/eLife.80379)
Supplement: Supplementary file 2. [file elife-80379-supp2.xlsx]

## Sheet: Tabelle1
Supplementary File 2
Relative volumes (% of total brain)	STD		ENR
Atlas region of interest	Mean	SD	Mean	SD	Effect size	p-value	q-value
CA10r	0.44738	0.00910027	0.473984	0.0150545	2.92	2.9915e-07	5.4446e-05
CA1Py	0.224416	0.00643615	0.237746	0.00827928	2.07	3.6087e-05	0.003
SLu	0.138788	0.00286007	0.143452	0.00336634	1.63	0.0004	0.018
Cingulate cortex: area 25	0.122656	0.00561376	0.131763	0.00854244	1.62	0.0006	0.018
CA3Rad	0.4146	0.0114518	0.433159	0.00906609	1.62	0.0005	0.018
CA1Rad	0.547901	0.0189894	0.577692	0.0179867	1.57	0.0006	0.018
anterior commissure: pars anterior	0.252615	0.00687237	0.262933	0.0075172	1.5	0.0008	0.018
CA2Py	0.0403786	0.00147265	0.0425774	0.00122028	1.49	0.0009	0.018
CA2Rad	0.110282	0.0040401	0.116244	0.00426438	1.48	0.001	0.018
subependymale zone / rhinocele	0.0119803	0.00058852	0.0128212	0.00058385	1.43	0.0012	0.021
LMol	0.522882	0.0173502	0.546813	0.0174537	1.38	0.0016	0.025
CA3Py Outer	0.209137	0.00377114	0.214288	0.00569167	1.37	0.0026	0.034
CA20r	0.103834	0.004088	0.109362	0.00304886	1.35	0.0018	0.026
Medial orbital cortex	0.407661	0.0155329	0.426867	0.0197059	1.24	0.0043	0.049
CA3Py Inner	0.0250951	0.00104391	0.026369	0.00070166	1.22	0.0037	0.045
trunk of lobules 6-8 white matter	0.0297081	0.00139949	0.02752	0.00194853	-1.56	0.0007	0.018
lateral septum	0.660985	0.0135879	0.676651	0.0215635	1.15	0.0097	0.09
Dorsal tenia tecta	0.227926	0.0111501	0.240473	0.0162899	1.13	0.0098	0.09
subiculum	0.762248	0.0239373	0.789015	0.0182277	1.12	0.0065	0.07
GrDG	0.271241	0.0122978	0.283665	0.00707545	1.01	0.0112	0.09
MoDG	0.942832	0.0354134	0.975656	0.0254015	0.93	0.0181	0.12
PoDG	0.114363	0.00609634	0.119959	0.00334811	0.92	0.0182	0.12
crus 1: ansiform lobule (lobule 6)	1.00461	0.0339163	0.978868	0.0319769	-0.76	0.0492	0.29
Cortex-amygdala transition zones	0.186992	0.0109756	0.178234	0.0130166	-0.8	0.0463	0.28
corticospinal tract/pyramids	0.472244	0.0384946	0.440851	0.0274027	-0.82	0.033	0.21
lobule 8 white matter	0.0235941	0.00162314	0.0219915	0.00152367	-0.99	0.0142	0.1
cerebellar peduncle: middle	0.303269	0.00653291	0.296558	0.0110886	-1.03	0.0218	0.14
cerebellar peduncle: inferior	0.179725	0.00450286	0.17488	0.00582722	-1.08	0.0111	0.09
lobule 8: pyramis	0.358927	0.016881	0.340708	0.0200538	-1.08	0.01	0.09
trunk of arbor vita	1.0429	0.0138236	1.02694	0.0245818	-1.15	0.0121	0.09
pontine nucleus	0.219809	0.00767796	0.210791	0.009877	-1.17	0.0063	0.07
corpus callosum	2.82294	0.0444259	2.85811	0.081029	0.79	0.0787	0.346
fimbria	0.693526	0.0198472	0.709221	0.0317994	0.79	0.0659	0.332
bed nucleus of stria terminalis	0.279962	0.00603217	0.284477	0.00849073	0.75	0.0697	0.332
Accessory olfactory bulb: granule cell layer	0.041113	0.00219526	0.0427081	0.0018849	0.73	0.056	0.313
Anterior olfactory nucleus	0.497923	0.0132163	0.507331	0.0150749	0.71	0.0701	0.332
striatum	4.44428	0.0580988	4.48539	0.0842403	0.71	0.0876	0.349
nucleus accumbens	0.947501	0.0350515	0.969737	0.0267586	0.63	0.0866	0.349
Secondary somatosensory cortex	1.31656	0.0376126	1.33966	0.0539378	0.61	0.1333	0.449
olfactory peduncle	0.564403	0.0170519	0.574712	0.0149529	0.6	0.105	0.39
Cingulum	0.195714	0.00750644	0.200234	0.00776932	0.6	0.114	0.407
Cingulate cortex: area 32	0.564587	0.0363137	0.586204	0.0252075	0.6	0.1029	0.39
Temporal association area	0.566985	0.0152747	0.575961	0.0179744	0.59	0.1309	0.449
Olfactory bulb: mitral cell layer	0.226408	0.00676993	0.230149	0.0106746	0.55	0.1879	0.543
Olfactory bulb: granule cell layer	0.992684	0.0355303	1.0123	0.0428684	0.55	0.1564	0.482
Frontal cortex: area 3	0.155353	0.00387593	0.15745	0.00515953	0.54	0.1744	0.52
CA30r	0.667716	0.016665	0.676549	0.0212702	0.53	0.1782	0.523
Olfactory bulb: internal plexiform layer	0.161997	0.00472587	0.164451	0.00769339	0.52	0.2201	0.598
Olfactory bulb: external plexiform layer	1.564	0.0419485	1.5844	0.067579	0.49	0.2482	0.609
internal capsule	0.707635	0.0151787	0.71495	0.0242497	0.48	0.2508	0.609
Ectorhinal cortex	0.584956	0.0178449	0.593303	0.018893	0.47	0.2136	0.597
Cingulate cortex: area 24a	0.422167	0.0187487	0.43062	0.0217277	0.45	0.2381	0.609
Frontal association cortex	1.60304	0.0432452	1.62212	0.0581332	0.44	0.2653	0.612
Medial preoptic nucleus	0.038253	0.00199315	0.0390947	0.00226224	0.42	0.2658	0.612
Cingulate cortex: area 29c	0.441338	0.0142986	0.446944	0.0176951	0.39	0.3098	0.637
Primary somatosensory cortex	0.906051	0.016318	0.91239	0.032066	0.39	0.394	0.739
Ventral orbital cortex	0.351504	0.0101775	0.355411	0.0122081	0.38	0.3161	0.639
thalamus	3.87435	0.157349	3.93259	0.141685	0.37	0.3071	0.637
fundus of striatum	0.0383891	0.00090856	0.0387196	0.0015158	0.36	0.3908	0.739
Primary somatosensory cortex: upper lip region	1.15167	0.0230577	1.1598	0.0484843	0.35	0.4544	0.78
Cingulate cortex: area 24b	0.379799	0.0206147	0.386698	0.0187717	0.33	0.3549	0.68
Dorsolateral orbital cortex	0.205756	0.00781359	0.20819	0.00971712	0.31	0.4175	0.76
mammilothalamic tract	0.0551671	0.00160321	0.0556477	0.00241413	0.3	0.4614	0.78
Olfactory bulb: glomerular layer	1.03584	0.0249017	1.04329	0.0455596	0.3	0.4964	0.814
fornix	0.164237	0.00272292	0.165044	0.00392453	0.3	0.4596	0.78
Secondary auditory cortex: ventral area	0.326652	0.0101516	0.329292	0.0115715	0.26	0.4882	0.808
Lateral parietal association cortex	0.0461639	0.00168055	0.0465768	0.00220108	0.25	0.5271	0.842
pre-para subiculum	0.483046	0.0167443	0.486926	0.0192251	0.23	0.5368	0.842
cerebral aqueduct	0.0830623	0.00699859	0.0845623	0.0122965	0.21	0.619	0.88
posterior commissure	0.0337957	0.00257577	0.0342889	0.00245582	0.19	0.5953	0.88
globus pallidus	0.735651	0.0344963	0.741536	0.0279991	0.17	0.6272	0.88
Perirhinal cortex	0.536057	0.0212239	0.539508	0.0203618	0.16	0.6518	0.88
cerebellar peduncle: superior	0.230452	0.0110735	0.232245	0.0103443	0.16	0.6517	0.88
medial septum	0.312558	0.00739103	0.313744	0.00666303	0.16	0.6526	0.88
Secondary motor cortex	1.36591	0.0343327	1.37132	0.0438303	0.16	0.6823	0.899
Accessory olfactory bulb: glomerular, external plexiform and mitral cell layer	0.0824453	0.00533588	0.0832823	0.0048568	0.16	0.6604	0.884
paraflocculus white matter	0.0401493	0.00325755	0.0406504	0.00333664	0.15	0.6731	0.894
periaqueductal grey	0.851667	0.0491136	0.858426	0.0412773	0.14	0.6962	0.9
Cingulate cortex: area 24a'	0.190969	0.0108031	0.19238	0.00872847	0.13	0.7093	0.909
midbrain	3.14348	0.123503	3.15865	0.129162	0.12	0.737	0.925
fourth ventricle	0.161939	0.0127184	0.163428	0.0123196	0.12	0.7453	0.927
stria medullaris	0.164006	0.00696224	0.164789	0.0057345	0.11	0.7486	0.927
Medial parietal association cortex	0.100565	0.00332668	0.100891	0.00455918	0.1	0.803	0.945
lobules 4-5 white matter	0.111892	0.00966397	0.112785	0.00718466	0.09	0.7895	0.945
colliculus: superior	1.97362	0.0877236	1.98156	0.0764804	0.09	0.7979	0.945
cerebral peduncle	0.543272	0.0145244	0.544527	0.0140893	0.09	0.8103	0.945
lobule 10: nodulus	0.267789	0.00958608	0.268565	0.0152144	0.08	0.8445	0.967
flocculus white matter	0.0108183	0.00099462	0.0108792	0.00067908	0.06	0.8584	0.974
interpedunclar nucleus	0.0593842	0.00376693	0.0595792	0.00407513	0.05	0.8881	0.974
Caudomedial entorhinal cortex	1.09764	0.0607962	1.10056	0.0414155	0.05	0.8882	0.974
lateral olfactory tract	0.342285	0.0100993	0.34272	0.0144427	0.04	0.9138	0.978
Medial entorhinal cortex	0.149832	0.0091323	0.150102	0.0059292	0.03	0.931	0.978
basal forebrain	1.24366	0.0333902	1.24463	0.0340963	0.03	0.9363	0.978
hypothalamus	2.42264	0.0270583	2.42309	0.0591857	0.02	0.9721	0.978
Primary somatosensory cortex: jaw region	0.146184	0.00484428	0.146262	0.00540177	0.02	0.9652	0.978
Insular region: not subdivided	1.46395	0.0280851	1.46397	0.0485286	0	0.9985	0.999
nucleus interpositus	0.0968245	0.00384371	0.0967742	0.00381049	-0.01	0.9711	0.978
paraflocculus (PFL)	0.483275	0.0642695	0.482163	0.0721532	-0.02	0.9628	0.978
Cingulate cortex: area 24b'	0.132014	0.004965	0.131923	0.00546237	-0.02	0.9605	0.978
Secondary visual cortex: lateral area	0.545825	0.0150744	0.545505	0.0172127	-0.02	0.9546	0.978
Claustrum: dorsal part	0.048523	0.00152619	0.0484803	0.00178128	-0.03	0.9404	0.978
colliculus: inferior	1.29235	0.0486921	1.29074	0.0446379	-0.03	0.9262	0.978
lobules 4-5: culmen (ventral and dorsal)	0.96115	0.0409163	0.959716	0.045119	-0.04	0.9244	0.978
Primary motor cortex	1.59646	0.0617614	1.59422	0.0564348	-0.04	0.9189	0.978
ventral tegmental decussation	0.0287479	0.0021236	0.0286558	0.00198772	-0.04	0.9034	0.978
Cingulate cortex: area 29a	0.158678	0.00537937	0.15842	0.0062009	-0.05	0.8978	0.978
Ventral intermediate entorhinal cortex	0.226338	0.0145385	0.225609	0.0101478	-0.05	0.884	0.974
Amygdalopiriform transition area	0.227049	0.0141664	0.226266	0.0111293	-0.06	0.8739	0.974
third ventricle	0.259026	0.00796296	0.258557	0.0128956	-0.06	0.8875	0.974
Secondary visual cortex: mediolateral area	0.224425	0.00844987	0.223889	0.0104841	-0.06	0.8678	0.974
Posteromedial cortical amygdaloid area	0.293793	0.0164349	0.292453	0.0136323	-0.08	0.8163	0.946
Medial amygdala	0.294158	0.00645833	0.293603	0.0111927	-0.09	0.8407	0.967
Primary visual cortex	0.46796	0.0246113	0.465703	0.0209892	-0.09	0.7948	0.945
Secondary auditory cortex: dorsal area	0.289275	0.0069648	0.288634	0.00825903	-0.09	0.8068	0.945
flocculus (FL)	0.186117	0.0107396	0.185069	0.00811852	-0.1	0.7784	0.945
Primary somatosensory cortex: trunk region	0.104868	0.00412282	0.104459	0.00441446	-0.1	0.7868	0.945
Ventral tenia tecta	0.0279932	0.00196156	0.0277848	0.00167338	-0.11	0.7633	0.939
fasciculus retroflexus	0.0626217	0.00433847	0.0620888	0.00403431	-0.12	0.7314	0.924
dentate nucleus	0.0715278	0.00292835	0.0711128	0.00298764	-0.14	0.6972	0.9
pons	3.94899	0.11271	3.93214	0.125082	-0.15	0.6867	0.899
Primary somatosensory cortex: dysgranular zone	0.0721915	0.0029397	0.0717108	0.00231319	-0.16	0.6401	0.88
stria terminalis	0.207029	0.00297221	0.206525	0.00611512	-0.17	0.7148	0.91
lateral ventricle	0.727088	0.090792	0.711326	0.0699002	-0.17	0.6189	0.88
Primary auditory cortex	0.298768	0.00633721	0.297637	0.00819396	-0.18	0.6438	0.88
anterior commissure: pars posterior	0.116463	0.0036081	0.115807	0.00381773	-0.18	0.6205	0.88
Secondary visual cortex: mediomedial area	0.374938	0.0108189	0.372959	0.015992	-0.18	0.6497	0.88
Dorsal nucleus of the endopiriform	0.334978	0.00788379	0.333513	0.00857635	-0.19	0.6155	0.88
inferior olivary complex	0.0923581	0.00763524	0.0909225	0.0076848	-0.19	0.6054	0.88
Intermediate nucleus of the endopiriform claustrum	0.143122	0.00551119	0.142074	0.00615159	-0.19	0.6092	0.88
Dorsolateral entorhinal cortex	0.617344	0.0374648	0.609916	0.0289215	-0.2	0.5708	0.873
Cingulate cortex: area 29b	0.0900079	0.00513291	0.08899	0.00397401	-0.2	0.5708	0.873
Claustrum: ventral part	0.112193	0.0032716	0.111543	0.00414521	-0.2	0.6048	0.88
facial nerve (cranial nerve 7)	0.0526399	0.00185768	0.0522547	0.0023299	-0.21	0.5884	0.88
Parietal cortex: posterior area: rostral part	0.0225101	0.00119345	0.0222574	0.00110909	-0.21	0.5556	0.864
lobule 9 white matter	0.0621462	0.00584209	0.0608231	0.00486974	-0.23	0.5222	0.841
Claustrum	0.067804	0.00156091	0.0674248	0.00204563	-0.24	0.5318	0.842
Primary visual cortex: monocular area	0.403308	0.0139007	0.39986	0.018014	-0.25	0.5219	0.841
Dorsal intermediate entorhinal cortex	0.393822	0.0250689	0.387516	0.0175422	-0.25	0.4692	0.783
lobule 3: central lobule (dorsal)	0.43877	0.0228348	0.432701	0.0217379	-0.27	0.463	0.78
copula: pyramis (lobule 8)	0.553806	0.0376712	0.543599	0.0272506	-0.27	0.4379	0.772
lobule 9: uvula	0.644925	0.0471302	0.631796	0.0443175	-0.28	0.4413	0.772
habenular commissure	0.00632786	0.0008747	0.00608133	0.0008709	-0.28	0.4405	0.772
Ventral nucleus of the endopiriform claustrum	0.119793	0.00443465	0.11847	0.00450212	-0.3	0.4164	0.76
trunk of simple and crus 1 white matter	0.0373208	0.00146947	0.0368749	0.00141873	-0.3	0.4046	0.751
Primary visual cortex: binocular area	0.433099	0.0137849	0.428912	0.0165336	-0.3	0.425	0.766
simple lobule (lobule 6)	1.08792	0.0349197	1.07564	0.0313496	-0.35	0.3306	0.647
fastigial nucleus	0.101347	0.00338382	0.100129	0.00407834	-0.36	0.347	0.672
cuneate nucleus	0.0643154	0.00502328	0.0625033	0.00478181	-0.36	0.3232	0.639
copula white matter	0.0141516	0.00107337	0.0137617	0.0009019	-0.36	0.3113	0.637
simple lobule white matter	0.070499	0.00338914	0.0692437	0.00317815	-0.37	0.3098	0.637
lobule 3 white matter	0.0361269	0.00253026	0.0351829	0.00227096	-0.37	0.3033	0.637
Primary somatosensory cortex: shoulder region	0.0393175	0.00157488	0.0387296	0.00178642	-0.37	0.323	0.639
Primary somatosensory cortex: barrel field	1.91317	0.0609902	1.88988	0.0668575	-0.38	0.3089	0.637
Primary somatosensory cortex: forelimb region	0.815875	0.0354365	0.802219	0.0293203	-0.39	0.2832	0.628
lobules 1-2: lingula and central lobule (ventral)	0.355821	0.0327079	0.343081	0.0250262	-0.39	0.2741	0.616
paramedian lobule (lobule 7)	0.94905	0.0901386	0.91229	0.0510832	-0.41	0.2424	0.609
amygdala	2.24971	0.0513956	2.22835	0.0580586	-0.42	0.2726	0.616
anterior lobule (lobules 4-5)	0.351738	0.0121701	0.346638	0.011593	-0.42	0.2542	0.609
Cingulate cortex: area 30	0.596092	0.0117801	0.591124	0.0177814	-0.42	0.3035	0.637
Primary somatosensory cortex: hindlimb region	0.53968	0.0198941	0.530866	0.0229392	-0.44	0.2455	0.609
crus 2: ansiform lobule (lobule 7)	0.960875	0.0918023	0.919777	0.0468659	-0.45	0.2001	0.569
olfactory tubercle	0.926979	0.0549431	0.902165	0.070233	-0.45	0.2482	0.609
anterior lobule white matter	0.0110347	0.00050074	0.0108049	0.00049537	-0.46	0.2166	0.597
mammillary bodies	0.134875	0.00461294	0.132702	0.00746167	-0.47	0.2634	0.612
optic tract	0.435061	0.00931431	0.430595	0.0140066	-0.48	0.2432	0.609
Lateral orbital cortex	0.743503	0.0130152	0.736867	0.0236961	-0.51	0.2491	0.609
lobule 1-2 white matter	0.0125864	0.00141589	0.0118411	0.00137679	-0.53	0.1588	0.482
crus 2 white matter	0.0486475	0.00478432	0.0460857	0.00316053	-0.54	0.1367	0.452
Rostral amygdalopiriform area	0.0955994	0.00482547	0.0929804	0.00496822	-0.54	0.1507	0.481
Piriform cortex	2.30615	0.103688	2.24907	0.121831	-0.55	0.1552	0.482
paramedian lobule	0.0253277	0.00245177	0.0238934	0.00169878	-0.58	0.1083	0.394
trunk of crus 2 and paramedian white matter	0.0905722	0.00676048	0.0864912	0.00537891	-0.6	0.1022	0.39
medulla	6.63317	0.217636	6.49262	0.205914	-0.65	0.0882	0.349
superior olivary complex	0.166278	0.00918908	0.160266	0.00661249	-0.65	0.077	0.346
trunk of lobules 1-3 white matter	0.0333659	0.00123522	0.0325457	0.00236787	-0.66	0.1454	0.473
crus 1 white matter	0.0643913	0.0031403	0.0622969	0.00357585	-0.67	0.0876	0.349
lobules 6-7 white matter	0.174698	0.00782361	0.169403	0.0082676	-0.68	0.0798	0.346
lobule 7: tuber (or folium)	0.255576	0.0216232	0.240625	0.0201534	-0.69	0.0695	0.332
medial lemniscus/medial longitudinal fasciculus	0.627754	0.0301607	0.606599	0.0282745	-0.7	0.0662	0.332
Posterolateral cortical amygdaloid area	0.206389	0.00799327	0.200703	0.00926687	-0.71	0.071	0.332
lobule 10 white matter	0.0161002	0.00051307	0.0157207	0.00112197	-0.74	0.129	0.449
lobule 6: declive	0.629176	0.0301765	0.606439	0.0344151	-0.75	0.0567	0.313
